# Supplementary material for: Evolution of the mitochondrial genome in snakes: Gene rearrangements and phylogenetic relationships
Source: Springer Nature journal article supplement (doi:10.1186/1471-2164-9-569), 2008-11-28

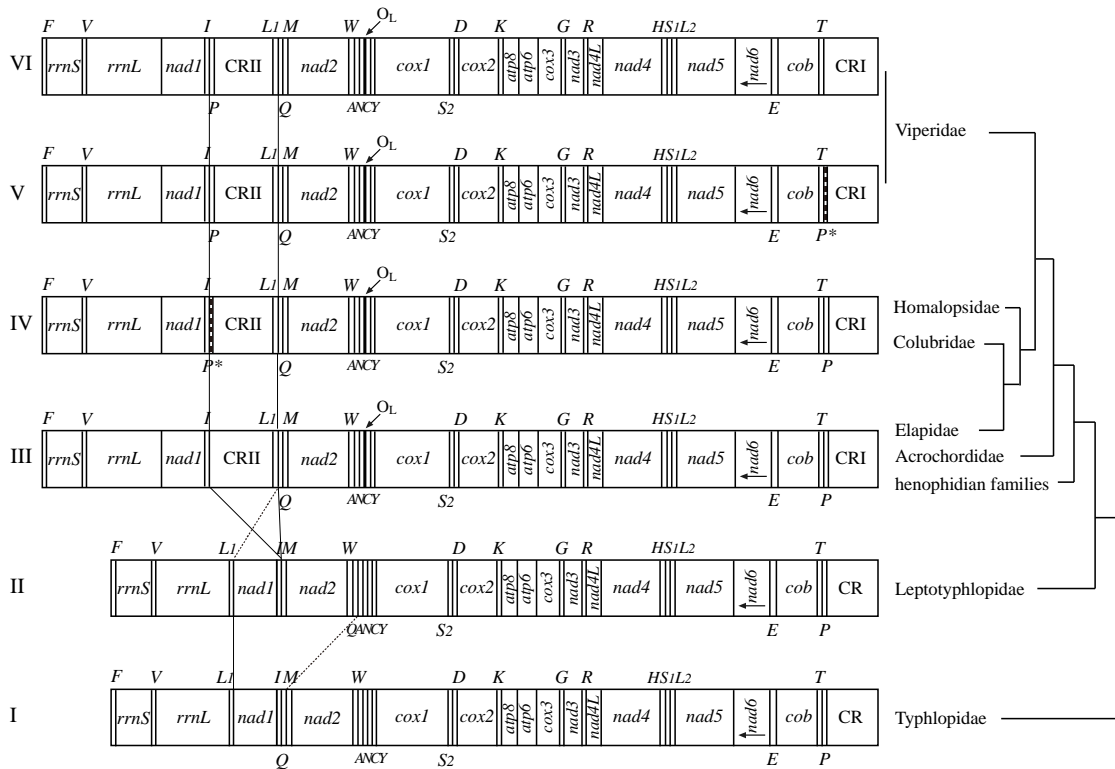

Supplement: 12864_2008_1762_MOESM1_ESM.pdf [file 12864_2008_1762_MOESM1_ESM.pdf]
