# Supplementary material for: Evolution of the mitochondrial genome in snakes: Gene rearrangements and phylogenetic relationships
Source: Springer Nature journal article supplement (doi:10.1186/1471-2164-9-569), 2008-11-28
Supplement: 12864_2008_1762_MOESM2_ESM.pdf [file 12864_2008_1762_MOESM2_ESM.pdf]

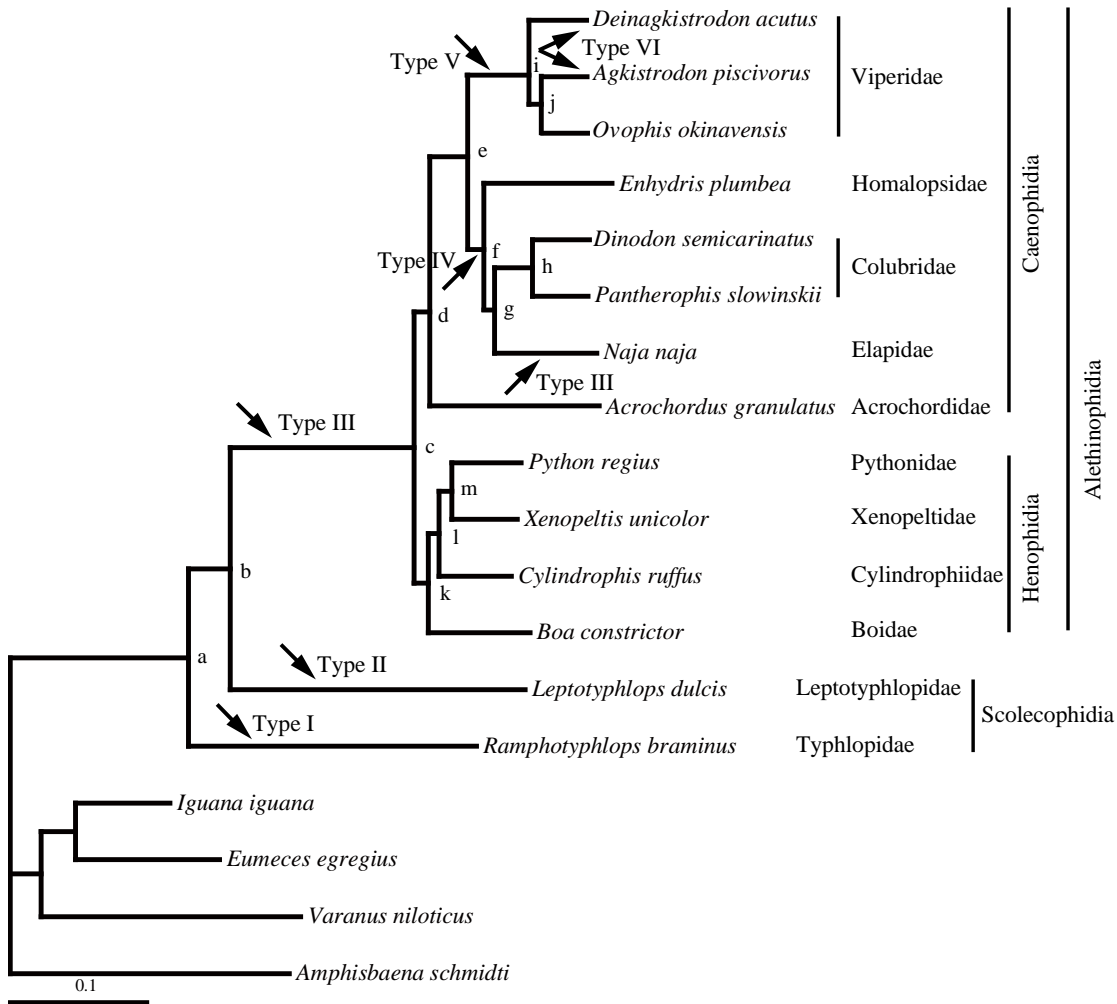

a b c d e f g h i j k l m

|    | a    | b    | c    | d    | e    | f    | g    | h    | i    | j    | k    | l    | m    |
|----|------|------|------|------|------|------|------|------|------|------|------|------|------|
| nt |      |      |      |      |      |      |      |      |      |      |      |      |      |
| BI | 1.00 | 1.00 | 1.00 | 1.00 | 1.00 | 1.00 | 1.00 | 1.00 | 1.00 | 1.00 | 1.00 | 0.90 | 0.89 |
| ML | 100  | 76   | 100  | 82   | 100  | 100  | 95   | 100  | 100  | 74   | 88   | 49   | 44   |
| MP | 100  | 52   | 99   | NR   | 100  | 98   | 69   | 100  | 100  | 74   | 99   | 64   | 41   |
| NJ | 100  | 68   | 100  | NR   | 100  | 99   | 75   | 100  | 100  | 90   | 100  | 99   | 56   |
| pr |      |      |      |      |      |      |      |      |      |      |      |      |      |
| BI | 1.00 | 1.00 | 1.00 | 1.00 | 1.00 | 1.00 | 0.93 | 1.00 | 1.00 | 1.00 | 1.00 | 1.00 | 1.00 |
| ML | 96   | 74   | 81   | NR   | 99   | 99   | 55   | 100  | 100  | 100  | 100  | 99   | 100  |
